# Supplementary material for: A multicentre randomised controlled trial evaluating lactobacilli and bifidobacteria in the prevention of antibiotic-associated diarrhoea in older people admitted to hospital: the PLACIDE study protocol
Source: Springer Nature journal article supplement (doi:10.1186/1471-2334-12-108), 2012-05-06
Supplement: 12879_2012_1945_MOESM1_ESM.pdf [file 12879_2012_1945_MOESM1_ESM.pdf]

Review all admissions to ABMUHB or CDDFT hospitals<sup>1</sup> who are aged  $\geq 65$  years and where consultant has given approval to invite to join study

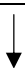

No exclusion criteria

One or more exclusion criteria; record details

Participant able to consent; discuss study, invite to enroll and provide patient information leaflet

Participant unable to consent; discuss and provide information leaflet to relative / carer

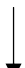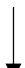

Revisit;<sup>2</sup> consent obtained

Revisit;<sup>2</sup> assent obtained

Consent or assent declined; record reason given, if any

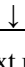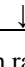

Allocate next unique identification number from randomized allocation sequence and provide corresponding numbered IMP<sup>3</sup>

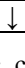

Collect baseline demographic, clinical and quality of life data

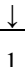

Commence intervention; 1 capsule daily for 21 days

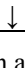

Follow up daily during admission and weekly to 8 weeks after stopping antibiotics (maximum 12 weeks) to document

- occurrence of diarrhoea; collect stool sample if diarrhoea develops
- serious adverse events
- quality of life questionnaire at recruitment and 4 and 8 weeks

Withdraw participants who develop pancreatitis or illness requiring high dependency or intensive care. Stop IMP but include data in intention to treat analysis.
